# Supplementary material for: Patterns of polymorphism and selection in the subgenomes of the allopolyploid Arabidopsis kamchatica
Source: PubMed Central journal article supplement (PMC6156220; doi:10.1038/s41467-018-06108-1), 2018-09-25
Supplement: 41467_2018_6108_MOESM1_ESM.pdf [file 41467_2018_6108_MOESM1_ESM.pdf]

Patterns of polymorphism and selection in the subgenomes of the allopolyploid  
*Arabidopsis kamchatica*

Timothy Paape, Roman V. Briskine, Gwyneth Halstead-Nussloch, Heidi E.L Lischer, Rie Shimizu-Inatsugi, Masaomi Hatakeyama, Kenta Tanaka, Tomoaki Nishiyama, Renat Sabirov, Jun Sese, Kentaro K. Shimizu

## Supplementary Methods

### Reference genome assembly of *A. lyrata* subsp. *petraea*

We assembled the genomes of *A. halleri* subsp. *gemmaifera* (W302)<sup>1</sup> collected from the Tada mine in Japan and *A. lyrata* subsp. *petraea* (lyrpet4) collected from Siberia representing each of the closest known diploid parents of *A. kamchatica*<sup>2,3</sup>. Both *A. halleri* and *A. lyrata* are predominantly self-incompatible (SI). To reduce heterozygosity, we selfed *A. halleri* five times using bud pollination<sup>4</sup>. The Siberian *A. lyrata* genotype (lyrpet4) lost SI in its natural habitat, so we were able to perform two rounds of regular self-fertilization. Previously, we reported medium quality assemblies (v1.0) for both of these genotypes<sup>5</sup> as well as an improved version of *A. halleri*<sup>1</sup>. Here, we provide an improved version of the *A. lyrata* lyrpet4 assembly that was generated using the pipeline described by Briskine *et al.* (2016)<sup>1</sup> for *A. halleri* W302 and we refer to the new assemblies as version 2.2 (v2.2).

We created long-insert mate-pair libraries to complement the short-insert libraries published by Akama *et al.* (2014)<sup>5</sup>. We used the leaf tissue of *A. lyrata* lyrpet4 to construct the mate-pair libraries with Illumina Nextera Mate-Pair Library Prep kit modified for large insert sizes. After tagmentation with Mate Pair Tagment Enzyme, the DNA was separated by pulsed field electrophoresis into variable ranges of 22–38 kb, 15–22 kb, 11–15 kb, 7–11 kb, 5.0–7 kb, and 3.0–5.0 kb. For each range, 270–600 ng of DNA was recovered using a Zymoclean Large Fragment DNA Recovery Kit. After circularization, exonuclease treatment, fragmentation with Covaris S1, A-tailing, and adapter ligation, 14 cycles of PCR were carried out for 22–38 kb, 15–22 kb, and 11–15 kb fraction, and 10 cycles for the 7–11 kb, 5.0–7kb, and 3.0–5.0 kb fractions. After quantification of the libraries by qPCR using KAPA Library Quantification Kit for Illumina platforms, four additional cycles of PCR were performed for the 22–38 kb and 7–11 kb fractions. The libraries were purified with an AMPure XP kit, quantified with the KAPA kit again, and mixed based on the measurement. The libraries were sequenced on Illumina HiSeq 2500 at the Functional Genomics Center Zurich (<http://www.fgcz.ch>).

The *A. lyrata* genome was assembled from all available untrimmed read libraries with ALLPATHS-LG R50599<sup>6</sup> using the default parameters in two steps. In the first step, we specified expected insert sizes. In the second step, we switched to the insert sizes reported by ALLPATHS-LG in the first step. The assembly job had a peak memory utilization of 191 Gb and was completed in 84 hours on a Linux server using 30 cores.

### Genome annotation of *A. lyrata* subsp. *petraea*

Both parental genomes were annotated using the same pipeline based on the recommendations from the AUGUSTUS Development Team<sup>7</sup>. The details for *A. halleri* can be found in Briskine *et al.* (2016)<sup>1</sup>. Here, we provide a brief description of the *A. lyrata* lyrpet4 annotation process (see the pipeline flowchart by Briskine *et al.* (2016)<sup>1</sup>. First, we aligned un-stranded paired-end 100 bp reads from *A. lyrata* W1739\_L2 (leaf) and W1739\_R0 (root) libraries from Paape *et al.* (2016)<sup>8</sup> against the *A. lyrata* lyrpet4 assembly using STAR v2.4.0i<sup>9</sup>. We extracted intron hints from the alignments and combined them with *nonexonpart* hints obtained from the RepeatMasker v4.0.5<sup>10</sup> output. The combined hints were supplied to AUGUSTUS v3.0.3 for the initial run. These obtained gene models were used to extract exon–exon junction sequences against which we aligned the original RNA-seq reads using bowtie2 v2.2.4<sup>11</sup>. We merged exon-exon junction alignments with the alignments to the complete reference genome and used the combined data to produce intron hints for the final AUGUSTUS run. Human readable functional descriptions were added using the AHRD tool<sup>12</sup>. Reciprocal best BLAST hits were calculated individually between *A. halleri* W302 or *A. lyrata* lyrpet4 and *A. thaliana* TAIR10 by aligning all coding sequences using NCBI BLAST+ v2.2.29 and comparing the scores for hits longer than 200 bp. Similarly, we calculated reciprocal best BLAST hits between W302 or lyrpet4 and *A. lyrata* subsp. *lyrata* annotation v2.0 of strain MN47 v1.07 released by Rawat *et al.* (2015)<sup>13</sup> for the Joint Genome Initiative (JGI) reference genome v1.07.

### **Improving diploid assemblies using synteny**

Both *A. halleri* and *A. lyrata* diverged recently<sup>3,14</sup> and each has eight chromosomes<sup>15</sup> allowing us to use the *A. lyrata* subsp. *lyrata* strain MN47 v1.07 reference assembly<sup>16</sup> to perform genome-wide synteny analysis. The complete genome, coding sequences, and gene annotation of *A. lyrata* JGI were downloaded from the Phytozome v9.0 website (<http://phytozome.jgi.doe.gov>). Coding sequences of *A. lyrata* JGI were aligned to our *A. lyrata* lyrpet4 assembly using BLAT v3.5<sup>17</sup> with default parameters except maximum intron size. Because the longest intron in the *A. lyrata* lyrpet4 assembly was 44,703 bp, we set the maximum intron size to 50 kb. Hits were filtered, sorted, and merged into syntenic regions using custom Perl scripts (see the GitLab repository). We only considered the hits covering at least 85% of the query sequence and accepted the hit from a syntenic gene even when it did not have the highest score for the locus. If an *A. lyrata* lyrpet4 scaffold contained two neighboring loci that were syntenic to two *A. lyrata* JGI regions located on different chromosomes or more than 100 kb apart, the scaffold was split into two parts by removing the sequence of unknown nucleotides. Scaffolds were only split if the sequence of unknown nucleotide N's at the cut site spanned at least 50 bp. After this correction, the scaffolds were sorted by length in descending order and named sequentially beginning with scaffold\_1. Because *A.*

*kamchatica* is a self-compatible species, we were able to remove most heterozygosity by self-fertilization and we treated both subgenomes separately as haploid (i.e. 8 homozygous chromosomes in each subgenome). Because three tandemly duplicated copies of *HMA4* were assembled on a single *A. halleri* scaffold (scaffold\_0116), we compared the synteny of this region with our *A. lyrata* subsp. *petrea* assembly, *A. lyrata* JGI, and *A. thaliana* (Fig. 2A, main text), which each contain only a single *HMA4* copy. This was necessary to compare genetic diversity of homeologs between the two subgenomes of *A. kamchatica* over putatively syntenic regions (see main text Methods for details). Alignments for the 118 genes in Fig. 2 in the main document with putative roles in metal tolerance, hyperaccumulation, metal ion transport, and metal homeostasis were collected from the following resources:<sup>18-24</sup>.

## Supplementary Note 1

### Reference assembly statistics

Our new *A. lyrata* assembly reduced the number of scaffolds from 281,536 from a previous version (v1.0, reported by Akama *et al.* (2014)<sup>5</sup> to 1,675 in version 2.2. The genome sizes of our diploid genome assemblies are 196 Mb (of which 78.9 Mb is genes) for *A. halleri* and 175 Mb (of which 75.4 Mb is genes) for *A. lyrata* (Table 1, main text). Using flow cytometry, we estimated the genome size of *A. halleri* to be 250 Mb and for *A. lyrata* it is 225 Mb, indicating that our assembled genomes captured 78% and 77% of the total genomes of both species respectively. Using flow cytometry, we estimated a genome size of 460-480 Mb for *A. kamchatica* (with some variation between genotypes), indicating that the combined genome sizes of both diploids are very close to flow cytometry estimates for the allopolyploid.

The number of annotated genes in the *A. lyrata* v2.2 assembly (31,232) is similar to the number in our *A. halleri* (Tada mine) v2.2 assembly (32,553), and to previously published *A. lyrata* subsp. *lyrata*<sup>16</sup> and *A. thaliana* gene annotations (Supplementary Table 1). Using reciprocal BLAST hits (RBH) to determine orthology of the annotated gene models to *A. thaliana*, we found 21,433 *A. halleri* and 21,472 *A. lyrata* genes could be assigned to a TAIR10 gene ID. Based on these results, we identified 23,529 *halleri*-origin and *lyrata*-origin homeologs (Supplementary Table 2). Our *A. halleri* and *A. lyrata* v2.2 genome assemblies also show very similar numbers of BLAST hits to the JGI *A. lyrata* genome (Supplementary Table 3).

## Supplementary Note 2

### Homeolog-specific PCR

We performed Sanger sequencing using homeolog-specific PCR to validate the read sorting method using *halleri*- or *lyrata*-origin SNPs for the following genes (TAIR10 IDs): AT1G02180, AT1G02290, AT1G02630 (*lyrata* only), AT1G17770, AT3G17360, AT3G10570, AT3G17611, AT4G01860 (*lyrata* only), AT4G26610, AT4G36080 (only the *halleri*-derived homeolog of KWS), AT5G13930: *CHS*, AT5G14750: *WER*. Sequence fragments ranged from 170 bp to 1,500 bp comprising a total of ca. 10 kb in length for the MUR, PAK and KWS accessions (OKH accession was used for the *WER halleri*-homeolog)<sup>2,25</sup>. We defined SNP positions based on differences between homeologous regions, where sequences were often enriched for SNPs due to highly divergent intron polymorphisms. Only three SNPs in Sanger sequences were different from the NGS data out of 1,375 total SNPs. However, the other SNPs in these sequences corresponded perfectly to their respective homeologous sequences and therefore still validated the read sorting method. We also had cases where double peaks were present in the Sanger sequences for one of the two homeologs, but in all cases the two SNPs corresponded to those shown in the NGS data for both homeologs, so both homeologs were partially amplified. We nevertheless consider these cases as supporting the NGS data since one homeolog was supported by Sanger data and both alleles were present in the other sequences.

### Supplementary Note 3

#### Population structure

We used 1,000 randomly selected coding sequence (CDS) alignments from both *halleri*- and *lyrata*-derived homeologs. We then individually concatenated the *halleri* alignments and the *lyrata* alignments to use for population structure and phylogenetic analysis. The input data sets for the population structure analysis contained 21,341 and 16,223 markers from *halleri*- and *lyrata*-origin CDSs respectively. We ran STRUCTURE v2.3.4<sup>26</sup> ten times for each K = 1 to 9 clusters using the admixture model and 50,000 MCMC rounds for burnin followed by 100,000 rounds to generate the data. The output was analyzed with STRUCTURE HARVESTER v0.6.94 and clusters were rearranged with CLUMPP v1.1.2. (Supplementary Fig. 2).

For phylogenetic analysis for each subgenome, we added *A. halleri* or *A. lyrata* as an outgroup and ran Mr. Bayes v3.2.6<sup>27</sup> with default parameters for 500,000 generations sampling every 1000<sup>th</sup> generation. Phylogenetic relationships of the 25 accessions were consistent with population structure clustering described above. In each of the three phylogenies (i.e., *lyrata* subgenome, *halleri* subgenome, both homeologs combined), three clades are fairly well resolved: one large clade from the southern species range (most of Japan), another main clade from the northern range containing samples from Far East Russia and Alaska (Supplementary Fig. 3), and a separate small clade containing *A. kamchatica* subsp. *kawasakiana* accessions along with a few

divergent accessions of *A. kamchatica* subsp. *kamchatica*. However, the relationship between these clades is different between the subgenomes. The clade containing subsp. *kawasakiana* is sister to the large Japanese clade in the *lyrata*-derived subgenome and it is sister to the Russia/Alaska clade in the *halleri*-derived subgenome (Supplementary Fig. 3). Different structure assignments and phylogenetic branching patterns between the subgenomes is not compatible with the scenario of a single origin of polyploidization, and supports that multiple parental individuals contributed to the origin of *A. kamchatica*.

## Supplementary Note 4

### Gene ontology analysis of loss-of-function mutations

For each subgenome, we conducted gene ontology (GO) analysis to determine whether there was enrichment for GO terms using the two most common high-impact mutation types, frameshift mutations and stop codons. The H-origin gene list consisted of 3,311 copies with frameshift mutations and 1,662 genes with premature stop codons (stop gained) (Supplementary Table 10). The L-origin gene list consisted of 4,014 genes with frameshift mutations and 2002 genes with premature stop codons (stop gained). GO analysis was performed using agriGO ([bioinfo.cau.edu.cn/agriGO](http://bioinfo.cau.edu.cn/agriGO)) using a custom set of containing 19,936 GO annotations as the search background that corresponded to *A. thaliana* orthologs with reciprocal-best BLAST hits for both homeologs. The query total in Supplementary Table 11 therefore corresponds to the numbers of genes in the H-origin and L-origin list with GO annotations in our custom *A. thaliana* ortholog list. We used only queries with at least 20 genes. For the list of genes with high impact mutations in both homeologs (511 genes, Supplementary Table 10), we included the total number of genes with any mutation type. Here again, the query total in Supplementary Table 11 corresponds to the numbers of genes in the H-origin and L-origin list with GO annotations in our custom *A. thaliana* ortholog list. For both subgenomes, hydrolase activity (GO:0016787) was the most significant GO term for molecular function, followed by several GO categories for nucleotide binding (Supplementary Table 11). Programmed cell death (GO:0012501) and apoptosis (GO:0006915) were significant in the *halleri*-origin genes only.

## Supplementary Figures

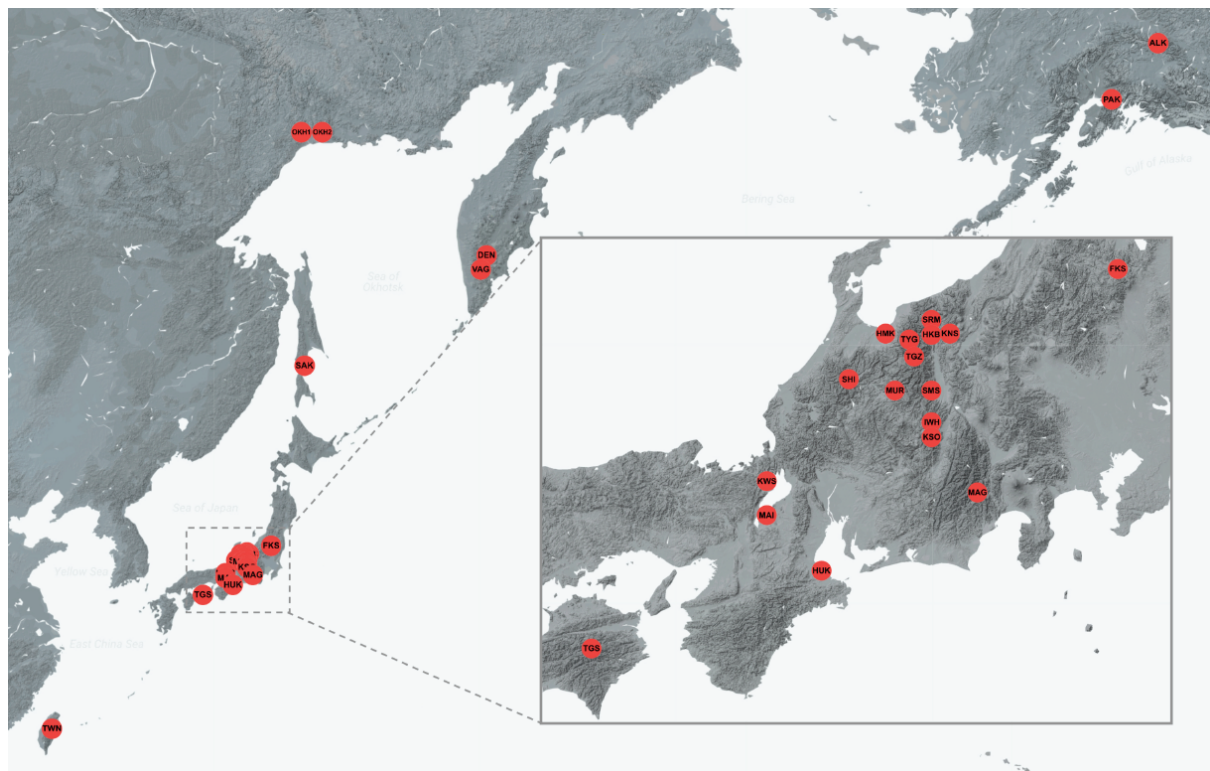

**Supplementary Fig. 1.** Map of 25 *Arabidopsis kamchatica* accessions sequenced in this study.

Created using GPS coordinates given in Supplementary Table 3 using <https://snazzymaps.com/> (all styles are licensed under creative commons and are completely free to use). Note that for populations OKH1 and OKH2 (Eastern Russia), and TGS and TYG (Central Japan), the overlapping points in the figure have been shifted slightly for visibility.

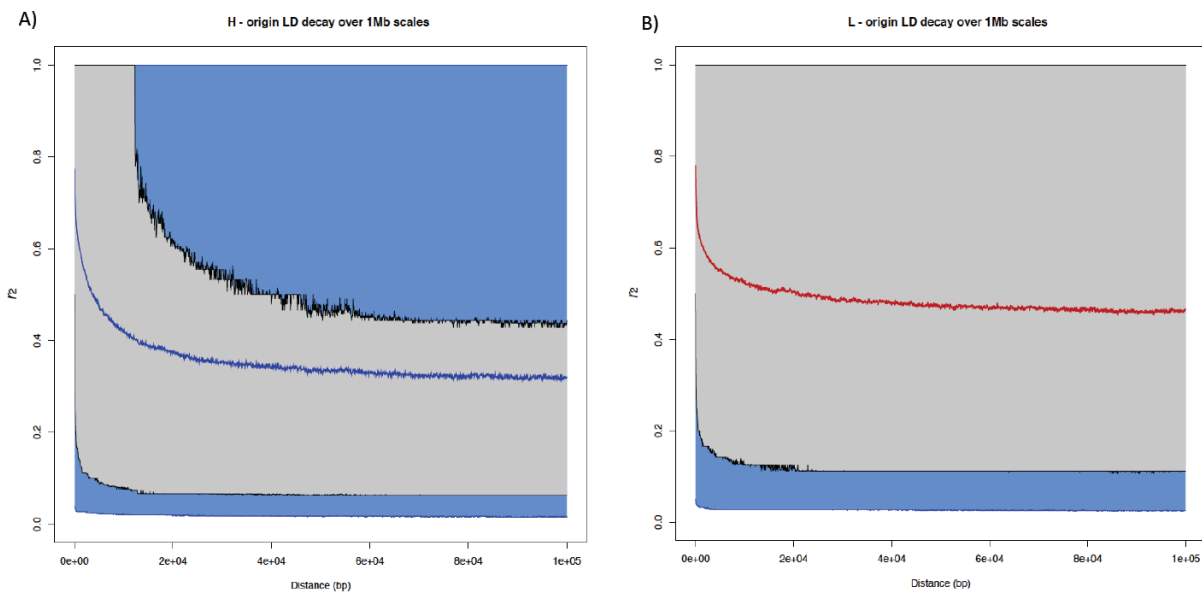

**Supplementary Fig. 2.** Linkage disequilibrium of *halleri*-origin (A) and *lyrata*-origin (B) subgenomes using 1 Mb windows along scaffolds. The blue (A) and red (B) curves represent the mean LD decay, while the gray region is the 50% confidence interval, and the blue region is the 90% confidence interval surrounding the means. The mean *lyrata*-origin LD remains at 0.47 while the *halleri*-origin LD levels off at 0.34 at the scale of 100 kb genomic regions.



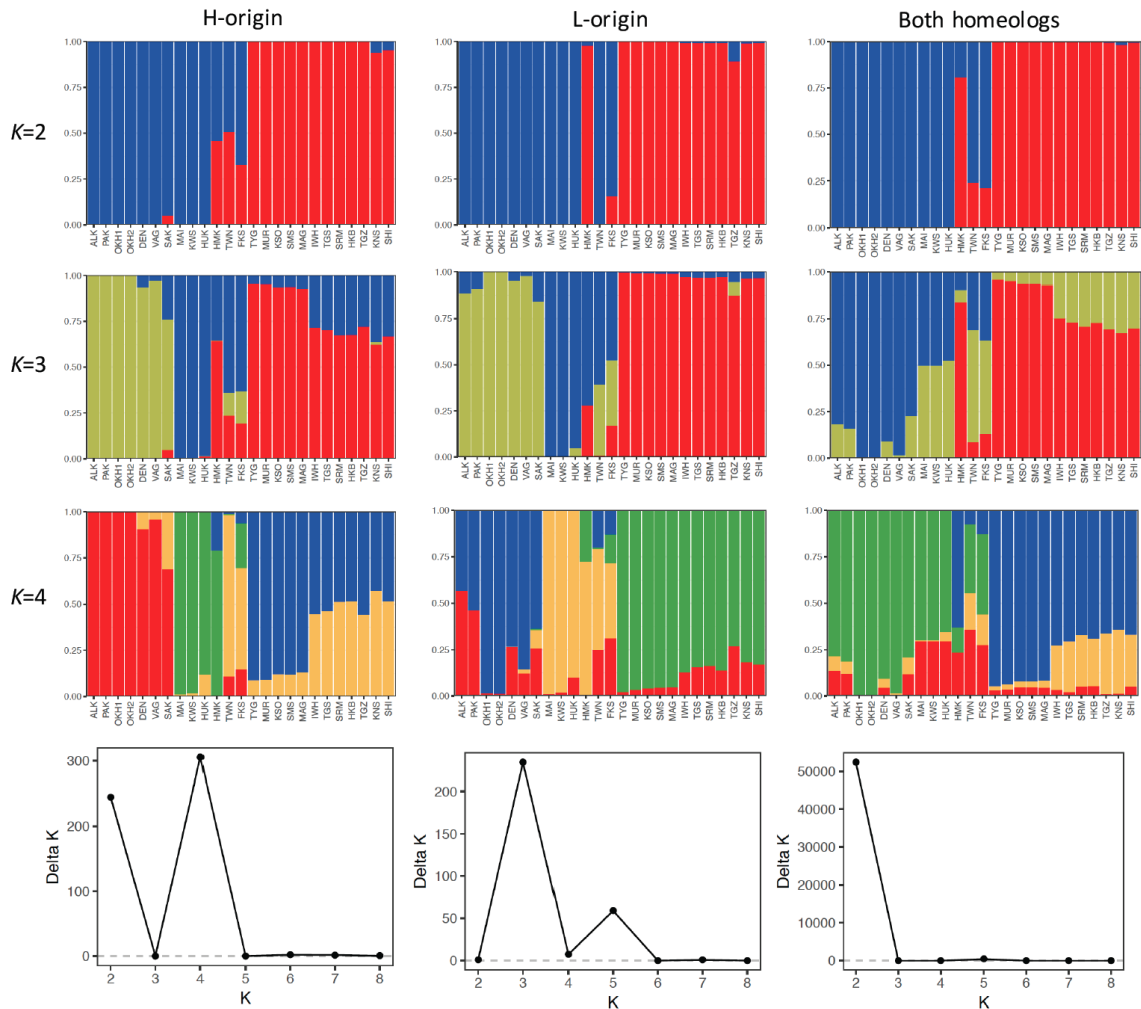

**Supplementary Fig. 3.** STRUCTURE assignments of *halleri* (H-origin)- and *lyrata* (L-origin)-derived homeologs for 25 *A. kamchatica* accessions for  $K = 2$  to  $K = 4$ . The third column is the STRUCTURE assignments using SNPs from both homeologs combined. The  $\Delta K^{28}$  plots show the most likely  $K$  group clustering to be  $K = 4$  for H-origin,  $K = 3$  for L-origin and  $K = 2$  using SNPs from both homeologs.

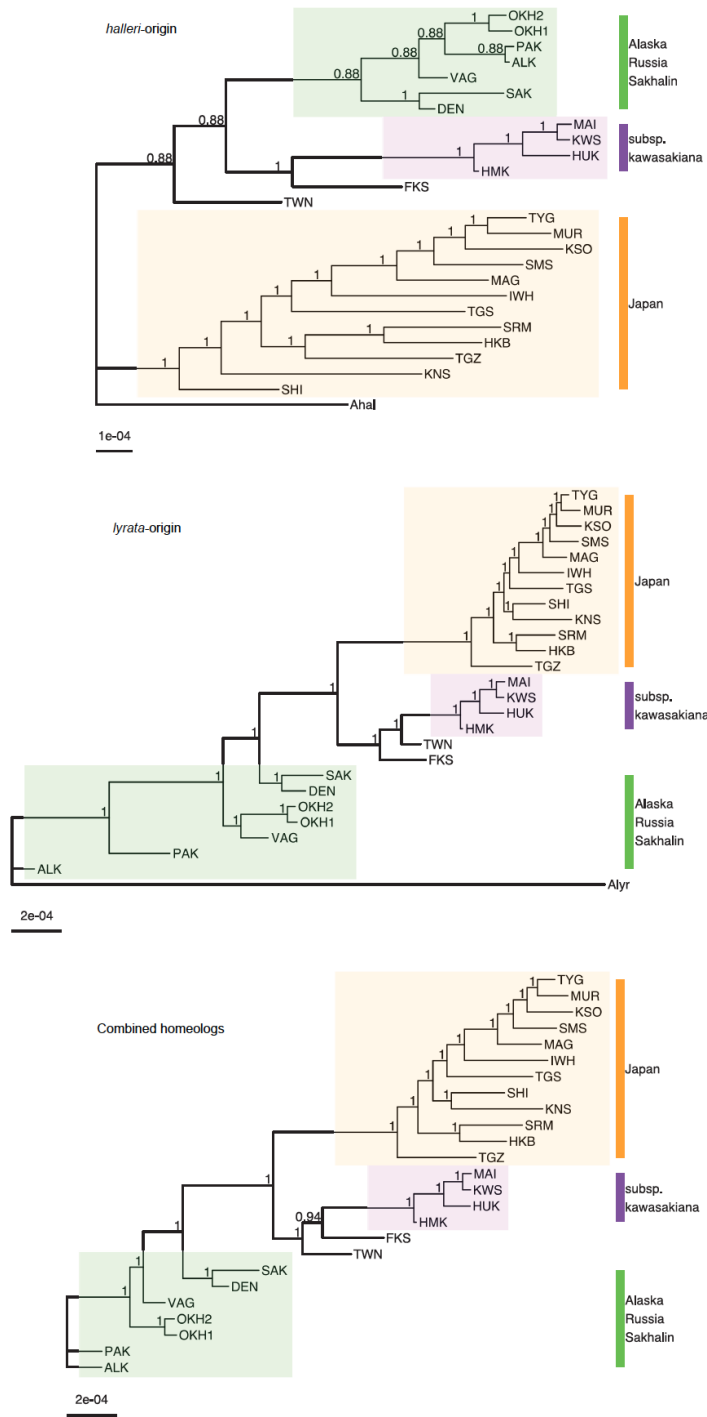

**Supplementary Fig. 4.** Phylogenetic relationships of 25 *A. kamchatica* accessions (top: *halleri*-subgenome; middle: *lyrata*-subgenome; bottom: both homeologs combined). Homeolog-specific trees show clustering of a large clade of Japanese accessions (orange), and a distinct clade of northern-latitude accessions (green) that are all *A. kamchatica* subsp. *kamchatica*. The small clustering of the *A. kamchatica* subsp. *kawasakiana* accessions is shown in purple, and is sister to the Japan clade in the *lyrata*-derived phylogeny, but sister to the Alaska/Russia in *halleri*-derived phylogeny. One accession from Taiwan is basal to the *kawasakiana* clade, and this lineage also contains an accession from Fukushima, Japan (FKS).

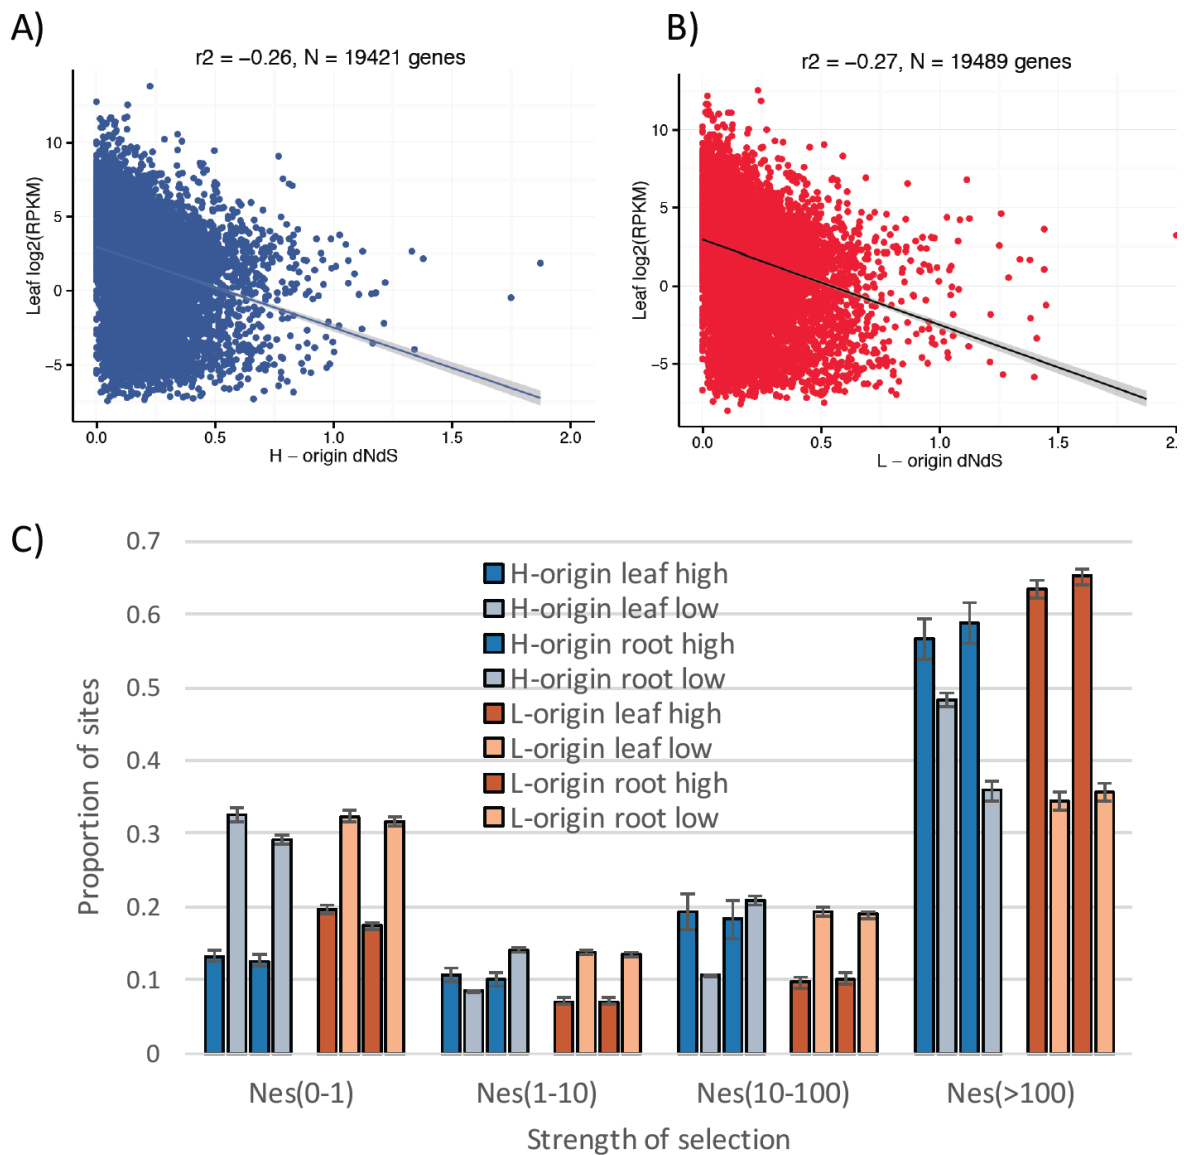

**Supplementary Fig. 5.** Gene expression and selective constraint. (A and B) Evolutionary rates are negatively correlated with gene expression in both homeologs. (C) DFE categorized by leaf and root expression levels in both subgenomes. Expression categories were taken from the upper 10% (high) and lower 10% (low) of expression distribution in all *A. kamchatica* homeologs.

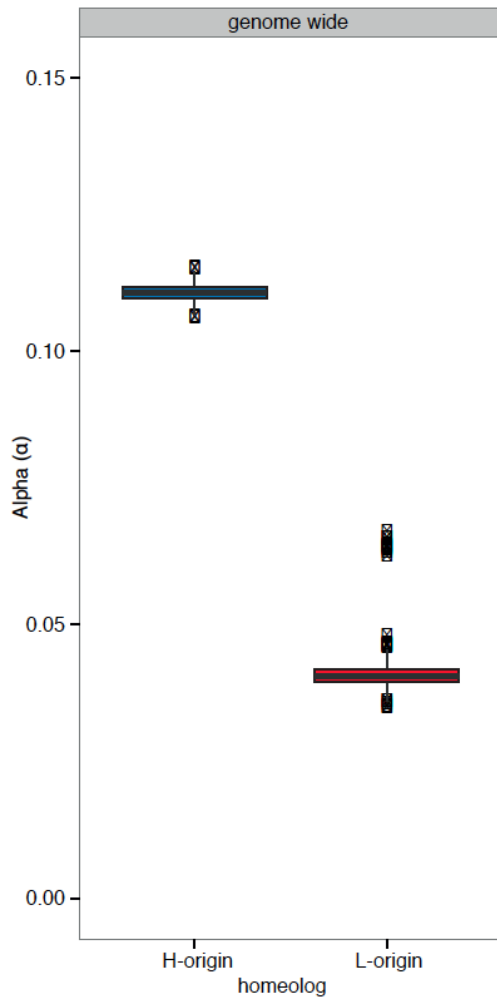

**Supplementary Fig. 6.** Estimates of adaptive evolution with all 25 *A. kamchatica* accessions. Mean  $\alpha$  for H-origin was 0.11 (CI: 0.108, 0.114) and for L-origin  $\alpha$  was 0.04 (CI: 0.037, 0.044). CI are 95% confidence intervals.

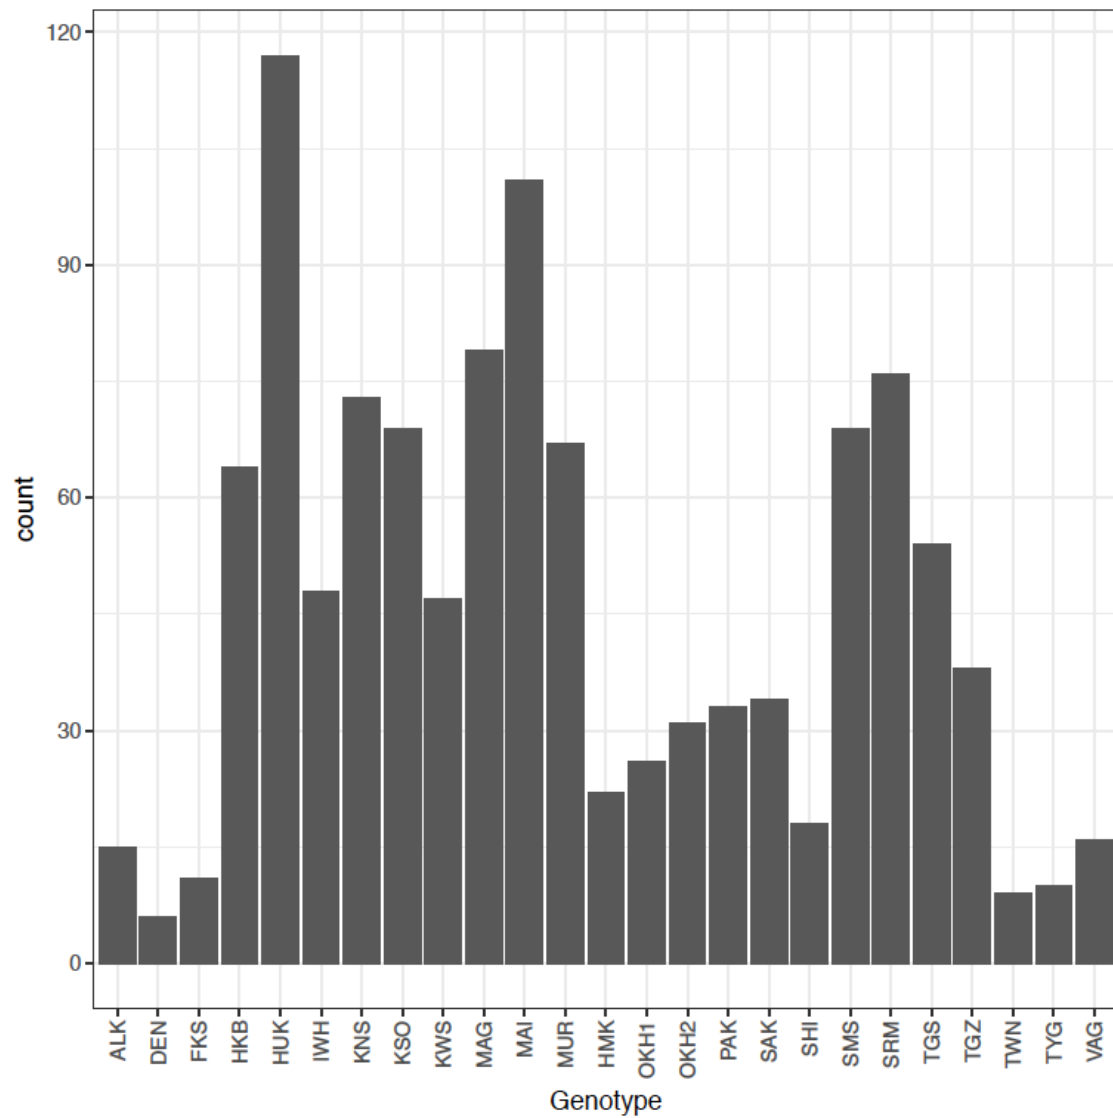

**Supplementary Fig. 7.** Frequencies of genes with high-impact mutations in each genotype when both homeologs have disruptive mutations (the distribution of 511 genes is from Supplementary Table 7 below).

## Supplementary Tables

**Supplementary Table 1.** The number of genes annotated in *A. halleri* and *A. lyrata* assemblies

| Annotation                          | Genes  | mRNA   | Exons   |
|-------------------------------------|--------|--------|---------|
| <i>A. halleri</i> v2.2 <sup>a</sup> | 32,553 | 34,553 | 187,838 |
| <i>A. lyrata</i> v2.2 <sup>b</sup>  | 31,232 | 33,157 | 181,219 |
| <i>A. lyrata</i> JGI <sup>c</sup>   | 32,670 | 32,670 | NA      |
| <i>A. thaliana</i> <sup>d</sup>     | 28,775 | 35,386 | 215,909 |

<sup>a</sup> v2.2 of *A. halleri* subsp. *gemmaifera* (Tada mine).

<sup>b</sup> v2.2 of Siberian *A. lyrata* subsp. *petraea*.

<sup>c</sup> Gene annotations<sup>13</sup> of the Joint Genome Institute (JGI) *A. lyrata* (MN47 v1.07) genome assembly<sup>16</sup> shown here for comparison.

<sup>d</sup> *A. thaliana* genome annotation from TAIR10

**Supplementary Table 2.** Reciprocal best BLAST hits among four genome assemblies of *Arabidopsis* species using our v.2.2 gene annotations in Supplementary Table 1<sup>a</sup>.

| Annotation A           | Annotation B          | Hits A on B | Hits B on A | RBH    |
|------------------------|-----------------------|-------------|-------------|--------|
| <i>A. halleri</i> v2.2 | <i>A. lyrata</i> v2.2 | 28,728      | 27,895      | 23,529 |
| <i>A. halleri</i> v2.2 | <i>A. thaliana</i>    | 25,328      | 23,728      | 21,433 |
| <i>A. halleri</i> v2.2 | <i>A. lyrata</i> JGI  | 26,402      | 26,917      | 22,447 |
| <i>A. lyrata</i> v2.2  | <i>A. lyrata</i> JGI  | 25,820      | 26,985      | 22,894 |
| <i>A. lyrata</i> v2.2  | <i>A. thaliana</i>    | 24,689      | 23,720      | 21,472 |
| <i>A. thaliana</i>     | <i>A. lyrata</i> JGI  | 24,033      | 25,716      | 21,941 |

<sup>a</sup> Only the longest transcript per gene was selected for the analysis. Hits A on B: hits from BLAST alignment of genes from the gene annotation A against the gene annotation B; RBH: reciprocal best BLAST hits. The *A. lyrata* MN47 v1.07 genome assembly by Hu *et al.*<sup>16</sup> is available from JGI and annotation from Rawat *et al.*<sup>13</sup>. The *A. thaliana* annotation is available at TAIR (<https://www.arabidopsis.org/>).

Supplementary Table 3. List of 25 *A. kamchatica* accessions, sampling locations and sequencing depth <sup>a</sup>

| Accession | Species                                                 | location                                                                    | lat_lon      | Reads       | Total_C<br>coverage | Sorted_Ahal | Sorted_Ahvr | Sorted_Com<br>mon | Total_Ahal | Total_Ahvr | Cov_<br>Ahal | Cov_<br>Ahvr | SNPs_Ahal | SNPs_Ahvr | BioSample    |
|-----------|---------------------------------------------------------|-----------------------------------------------------------------------------|--------------|-------------|---------------------|-------------|-------------|-------------------|------------|------------|--------------|--------------|-----------|-----------|--------------|
| ALK       | <i>Arabidopsis kamchatica</i> subsp. <i>kamchatica</i>  | USA: Alaska, Richardson Highway, South of Darling Creek bridge              | 63.4N 145.8W | 41,222,868  | 8.8                 | 14,118,890  | 10,796,478  | 1,121,305         | 15,172,336 | 11,851,960 | 7.8          | 6.8          | 170,099   | 267,382   | SAMD00089941 |
| DEN       | <i>Arabidopsis kamchatica</i> subsp. <i>kamchatica</i>  | Russia: Kamchatskii krai, near the river Denokhonok                         | 54.2N 158.1E | 29,858,928  | 6.3                 | 10,393,815  | 7,703,567   | 764,879           | 11,122,492 | 8,427,447  | 5.7          | 4.9          | 109,229   | 211,658   | SAMD00089945 |
| FKS       | <i>Arabidopsis kamchatica</i> subsp. <i>kamchatica</i>  | Japan: Fukushima                                                            | 37.2N 139.9E | 40,709,648  | 8.7                 | 14,460,719  | 10,002,155  | 1,729,908         | 16,138,372 | 11,676,183 | 8.3          | 6.7          | 167,396   | 320,181   | SAMD00089940 |
| HKB       | <i>Arabidopsis kamchatica</i> subsp. <i>kamchatica</i>  | Japan: Hakubayari                                                           | 36.7N 137.8E | 83,323,614  | 17.7                | 29,795,327  | 22,072,831  | 2,089,056         | 31,789,560 | 24,049,797 | 16.4         | 13.9         | 270,403   | 553,738   | SAMD00089930 |
| HMK       | <i>Arabidopsis kamchatica</i> subsp. <i>kawasakiana</i> | Japan: Toyama                                                               | 36.7N 137.3E | 70,437,142  | 15                  | 23,995,643  | 17,543,808  | 1,878,282         | 25,794,172 | 19,323,093 | 13.3         | 11.1         | 279,514   | 496,611   | SAMD00089926 |
| HUK       | <i>Arabidopsis kamchatica</i> subsp. <i>kawasakiana</i> | Japan: Hukinoura                                                            | 34.6N 136.6E | 106,898,796 | 22.7                | 37,136,448  | 27,677,971  | 2,750,024         | 39,756,647 | 30,274,808 | 20.5         | 17.5         | 340,598   | 617,775   | SAMD00089924 |
| IWH       | <i>Arabidopsis kamchatica</i> subsp. <i>kamchatica</i>  | Japan: Iwahana                                                              | 35.9N 137.8E | 52,549,196  | 11.2                | 18,872,866  | 14,148,184  | 1,425,613         | 20,239,313 | 15,500,712 | 10.4         | 8.9          | 229,511   | 476,579   | SAMD00089935 |
| KNS       | <i>Arabidopsis kamchatica</i> subsp. <i>kamchatica</i>  | Japan: Kinasa                                                               | 36.7N 138.0E | 91,705,866  | 19.5                | 32,746,897  | 24,388,091  | 2,336,948         | 34,975,970 | 26,595,190 | 18           | 15.3         | 289,477   | 583,765   | SAMD00089928 |
| KSO       | <i>Arabidopsis kamchatica</i> subsp. <i>kamchatica</i>  | Japan: Kisokomagatake                                                       | 35.8N 137.8E | 82,333,488  | 17.5                | 29,916,953  | 22,331,282  | 2,216,628         | 32,037,117 | 24,432,965 | 16.5         | 14.1         | 273,080   | 553,639   | SAMD00089929 |
| KWS       | <i>Arabidopsis kamchatica</i> subsp. <i>kawasakiana</i> | Japan: Takashima                                                            | 35.4N 136.0E | 57,556,260  | 12.2                | 18,879,180  | 13,938,194  | 1,710,830         | 20,528,832 | 15,573,108 | 10.6         | 9            | 214,919   | 385,250   | SAMD00045705 |
| MAG       | <i>Arabidopsis kamchatica</i> subsp. <i>kamchatica</i>  | Japan: Magosazima                                                           | 35.3N 138.3E | 100,480,490 | 21.4                | 35,909,855  | 26,847,065  | 2,604,139         | 38,400,425 | 29,310,981 | 19.8         | 16.9         | 290,361   | 593,827   | SAMD00089925 |
| MAI       | <i>Arabidopsis kamchatica</i> subsp. <i>kawasakiana</i> | Japan: Maiaimaha                                                            | 35.1N 136.0E | 99,558,822  | 21.2                | 34,004,362  | 25,237,282  | 2,475,873         | 36,363,640 | 27,575,460 | 18.7         | 15.9         | 324,490   | 585,919   | SAMD00089927 |
| MUR       | <i>Arabidopsis kamchatica</i> subsp. <i>kamchatica</i>  | Japan: Murodo                                                               | 36.2N 137.4E | 92,156,804  | 19.6                | 28,450,072  | 20,969,486  | 1,884,357         | 30,239,914 | 22,723,204 | 15.6         | 13.1         | 259,583   | 519,488   | SAMD00089932 |
| OKH1      | <i>Arabidopsis kamchatica</i> subsp. <i>kamchatica</i>  | Russia: Khabarovsk krai, Okhotskii raion, foothills of Mt. Lanzhinskii gory | 59.4N 143.3E | 47,972,636  | 10.2                | 16,240,333  | 12,120,236  | 1,057,909         | 17,225,075 | 13,098,741 | 8.9          | 7.6          | 208,143   | 400,845   | SAMD00089938 |
| OKH2      | <i>Arabidopsis kamchatica</i> subsp. <i>kamchatica</i>  | Russia: Khabarovsk krai, Okhotskii raion, foothills of Mt. Lanzhinskii gory | 59.4N 143.3E | 45,097,050  | 9.6                 | 15,717,431  | 11,766,389  | 1,179,854         | 16,842,632 | 12,882,931 | 8.7          | 7.4          | 197,546   | 380,656   | SAMD00089939 |
| PAK       | <i>Arabidopsis kamchatica</i> subsp. <i>kamchatica</i>  | USA: Alaska, Potter                                                         | 61.2N 149.3W | 180,109,152 | 38.3                | 27,117,743  | 20,836,034  | 2,642,737         | 29,631,690 | 23,318,884 | 15.3         | 13.4         | 214,144   | 361,332   | SAMD00089933 |
| SAK       | <i>Arabidopsis kamchatica</i> subsp. <i>kamchatica</i>  | Russia: Sakhalin, Marakovskii raion, Zaozemnoye                             | 48.4N 142.7E | 51,986,358  | 11.1                | 16,978,097  | 12,521,408  | 1,214,392         | 18,133,252 | 13,663,380 | 9.3          | 7.9          | 208,332   | 408,064   | SAMD00089937 |
| SHI       | <i>Arabidopsis kamchatica</i> subsp. <i>kamchatica</i>  | Japan: Shirakawa                                                            | 36.3N 136.9E | 36,818,198  | 7.8                 | 12,491,175  | 9,099,814   | 863,158           | 13,310,606 | 9,909,963  | 6.9          | 5.7          | 146,395   | 294,813   | SAMD00089943 |
| SMS       | <i>Arabidopsis kamchatica</i> subsp. <i>kamchatica</i>  | Japan: Simasimadani                                                         | 36.2N 137.8E | 82,024,638  | 17.4                | 28,623,779  | 21,103,492  | 2,121,047         | 30,651,632 | 23,110,874 | 15.8         | 13.3         | 267,098   | 535,000   | SAMD00089931 |
| SRM       | <i>Arabidopsis kamchatica</i> subsp. <i>kamchatica</i>  | Japan: Mt. Shirouma                                                         | 36.8N 137.8E | 103,381,614 | 22                  | 37,373,380  | 27,889,832  | 2,881,603         | 40,139,114 | 30,636,345 | 20.7         | 17.7         | 295,244   | 601,727   | SAMD00089923 |
| TGS       | <i>Arabidopsis kamchatica</i> subsp. <i>kamchatica</i>  | Japan: Mt. Shikokutsurugi                                                   | 33.9N 134.1E | 64,747,706  | 13.8                | 23,060,935  | 16,670,868  | 1,747,686         | 24,729,621 | 18,328,385 | 12.7         | 10.6         | 240,958   | 500,049   | SAMD00089934 |
| TGZ       | <i>Arabidopsis kamchatica</i> subsp. <i>kamchatica</i>  | Japan: Tsurugigozen                                                         | 36.6N 137.6E | 49,130,130  | 10.4                | 17,080,259  | 12,600,990  | 1,278,910         | 18,304,390 | 13,814,192 | 9.4          | 8            | 205,685   | 421,797   | SAMD00089936 |
| TWN       | <i>Arabidopsis kamchatica</i> subsp. <i>kamchatica</i>  | Taiwan: Taroko national park                                                | 24.0N 121.3E | 27,214,840  | 5.8                 | 9,374,591   | 6,723,726   | 725,591           | 10,068,892 | 7,412,536  | 5.2          | 4.3          | 99,741    | 178,623   | SAMD00045707 |
| TYG       | <i>Arabidopsis kamchatica</i> subsp. <i>kamchatica</i>  | Japan: Tateyamagawa                                                         | 36.6N 137.6E | 33,247,108  | 7.1                 | 11,084,924  | 8,145,924   | 755,793           | 11,802,582 | 8,856,608  | 6.1          | 5.1          | 127,526   | 255,460   | SAMD00089944 |
| VAG       | <i>Arabidopsis kamchatica</i> subsp. <i>kamchatica</i>  | Russia: Kamchatskii krai, near the river Vaktan Ganal'öskii                 | 53.5N 157.6E | 40,538,374  | 8.6                 | 13,933,714  | 10,460,424  | 960,743           | 14,843,746 | 11,362,106 | 7.6          | 6.6          | 171,068   | 331,211   | SAMD00089942 |

<sup>a</sup> The samples are in the DDBJ short read archive BioProjects PRJDB6166 and PRJDB4054 (KWS and TWN only).



**Supplementary Table 4.** Polymorphism and nucleotide diversity statistics of both subgenomes by sliding window analysis.

| H-origin   | bases <sup>a</sup> | bases (%) <sup>a</sup> | polym <sup>b</sup> | $\theta_w$ <sup>c</sup> | $\pi$ <sup>d</sup> |
|------------|--------------------|------------------------|--------------------|-------------------------|--------------------|
| overall    | 163517656          | 1                      | 1138032            | 0.0018                  | 0.0017             |
| gene       | 75291060           | 0.4604                 | 454338             | 0.0016                  | 0.0015             |
| coding     | 38896876           | 0.2379                 | 216194             | 0.0015                  | 0.0014             |
| intron     | 22946734           | 0.1403                 | 154633             | 0.0017                  | 0.0017             |
| intergenic | 83592223           | 0.5112                 | 660511             | 0.0035                  | 0.0033             |
|            |                    |                        |                    |                         |                    |
| L-origin   | bases              | Bases (%)              | polym              | $\theta_w$              | $\pi$              |
| overall    | 149864674          | 1                      | 946600             | 0.0017                  | 0.0017             |
| gene       | 72299008           | 0.4824                 | 436107             | 0.0016                  | 0.0016             |
| coding     | 37093072           | 0.2475                 | 205023             | 0.0015                  | 0.0015             |
| intron     | 21685851           | 0.1447                 | 146380             | 0.0018                  | 0.0018             |
| intergenic | 74042836           | 0.4941                 | 496233             | 0.0034                  | 0.0034             |

a: total number of nucleotides in each category and the proportion to the overall bases

b: polym = number of polymorphic sites in each category

c: Watterson's polymorphism estimator,  $\theta_w$

d: nucleotide diversity,  $\pi$

**Supplementary Table 5.** Samples used for estimating nucleotide diversity, site frequency spectra and DFE and  $\alpha$  in Fig. 4 in main text <sup>a</sup>.

| <i>A. kamchatica</i> | <i>A. lyrata</i> | <i>A. halleri</i> |
|----------------------|------------------|-------------------|
| ALK                  | SRR2040790_1     | SRR2040780_1      |
| DEN                  | SRR2040791_2     | SRR2040780_2      |
| HKB                  | SRR2040792_1     | SRR2040782_1      |
| IWH                  | SRR2040793_2     | SRR2040782_2      |
| KNS                  | SRR2040794_1     | SRR2040783_1      |
| KSO                  | SRR2040795_1     | SRR2040783_2      |
| MAG                  | SRR2040795_2     | SRR2040784_1      |
| MUR                  | SRR2040796_2     | SRR2040784_2      |
| OKH1                 | SRR2040797_2     | SRR2040785_1      |
| OKH2                 | SRR2040798_1     | SRR2040785_2      |
| PAK                  | SRR3111438_2     | SRR2040786_1      |
| SAK                  | SRR3111439_1     | SRR2040786_2      |
| SHI                  | SRR3111439_2     | SRR2040787_1      |
| SMS                  | SRR3111440_1     | SRR2040787_2      |
| SRM                  | SRR3111441_1     | SRR2040810_1      |
| TGS                  | SRR3111441_2     | SRR2040810_2      |
| TGZ                  | SRR3111442_2     | SRR3107262_1      |
| VAG                  | SRR3111443_1     | SRR3107262_2      |

<sup>a</sup> Illumina reads from European *A. halleri* and *A. lyrata* were obtained from Novikova *et al.*<sup>29</sup>. SNPs in diploid parents were phased and separated into two alleles, indicated by \_1 and \_2 following accession number. To get equal sample size, *A. lyrata* alleles samples were chosen at random.

**Supplementary Table 6.** Nucleotide diversity ( $\pi$ ) and Tajima's  $D$  estimates from *A. halleri* and *A. lyrata*.

|                       | <i>A. halleri</i> |        |         |       | <i>A. lyrata</i> |        |         |       | $r$  |
|-----------------------|-------------------|--------|---------|-------|------------------|--------|---------|-------|------|
|                       | Mean              | Median | St. Dev | N     | Mean             | Median | St. Dev | N     |      |
| $\pi_{\text{total}}$  | 0.0097            | 0.0077 | 0.0076  | 19693 | 0.0099           | 0.0079 | 0.0077  | 18276 | 0.55 |
| $\pi_{\text{nonsyn}}$ | 0.0054            | 0.0035 | 0.0101  | 19693 | 0.0053           | 0.0035 | 0.0077  | 18396 | 0.48 |
| $\pi_{\text{syn}}$    | 0.0281            | 0.0223 | 0.0377  | 19693 | 0.0282           | 0.0226 | 0.0255  | 18396 | 0.43 |
| Taj $D$               | -0.24             | -0.26  | 0.78    | 19644 | -0.39            | -0.41  | 0.74    | 18254 | 0.09 |

The mean, median and standard deviation (St. Dev) around the mean are reported for N numbers of homoeologs for each test statistic. The Pearson's correlation coefficient is denoted by  $r$  is the correlation between both homeologs for each statistic. All p-values for correlations are  $< 0.0001$ .

**Supplementary Table 7.** Estimated effective population sizes ( $N_e$ ) using empirical nucleotide diversity estimates and published mutation accumulation rates<sup>a</sup>.

| Species/subgenome    | $\pi_{syn}$ | $\pi_{total}$ | $N_e^b$ | $N_e^c$ |
|----------------------|-------------|---------------|---------|---------|
| <i>A. kamchatica</i> | 0.0046      | 0.0015        | 77000   | 53571   |
| H-origin             | 0.0044      | 0.0015        | 73333   | 52143   |
| L-origin             | 0.0049      | 0.0015        | 81667   | 53929   |
| <i>A. halleri</i>    | 0.028       | 0.0097        | 466667  | 364202  |
| <i>A. lyrata</i>     | 0.029       | 0.0102        | 483333  | 345041  |

<sup>a</sup> The calculation of  $N_e$  was conducted using the equation  $\pi_{syn}/4\mu$ . The mutation rates  $\mu$  were published by Koch *et al.*<sup>30</sup> who used only synonymous nucleotide diversity, and Ossowski *et al.*<sup>31</sup> who used total nucleotide diversity.

<sup>b</sup> Calculated using the mutation rate from Koch *et al.*<sup>30</sup>:  $\mu = 1.50E^{-08}$

<sup>c</sup> Calculated using the mutation rate from Ossowski *et al.*<sup>31</sup>:  $\mu = 7.00E^{-09}$

**Supplementary Table 8.** The number of intergenic sites used to construct two-dimensional joint site frequency spectra.

| <i>A. halleri</i> - H-origin   | SNPs <sup>a</sup> | <i>A. lyrata</i> - L-origin   | SNPs <sup>a</sup> |
|--------------------------------|-------------------|-------------------------------|-------------------|
| non polymorphic                | 119252            | non polymorphic               | 183452            |
| private SNPs <i>A. halleri</i> | 249368            | private SNPs <i>A. lyrata</i> | 221589            |
| private SNPs H-origin          | 52403             | private SNPs L-origin         | 53426             |
| shared SNPs                    | 89626             | shared SNPs                   | 48822             |
| total                          | 510649            | total                         | 507289            |

<sup>a</sup> SNPs used for the demographic analysis using the software fastsimcoal 2.6<sup>32</sup>.

**Supplementary Table 9.** Parameter estimates of two demographic models.

| <i>A. halleri</i> - H-origin | $N_e$ Diploid | $N_e$ Subgenome | $N_e$ ANC | $Tdiv$ | R0       | R1       | MaxEstLhood | df |
|------------------------------|---------------|-----------------|-----------|--------|----------|----------|-------------|----|
| M1 simple                    | 386838        | 84587           | 409504    | 101151 | -        | -        | -1250310    | 4  |
| 2.5%                         | 372371        | 74300           | 383996    | 87527  |          |          |             |    |
| 97.5%                        | 407645        | 88101           | 436662    | 105547 |          |          |             |    |
| M2 exp growth                | 317586        | 83939           | 317940    | 74579  | -1.3E-07 | -4.0E-06 | -1284541    | 6  |
| 2.5%                         | 307220        | 77039           | 314511    | 64478  | -7.8E-07 | -1.6E-05 |             |    |
| 97.5%                        | 341770        | 103347          | 369935    | 79773  | -1.2E-07 | -2.3E-06 |             |    |
| <i>A. lyrata</i> - L-origin  | $N_e$ Diploid | $N_e$ Subgenome | $N_e$ ANC | $Tdiv$ | R0       | R1       | MaxEstLhood |    |
| M1 simple                    | 328403        | 90324           | 345220    | 136871 |          |          | -1020366    | 4  |
| 2.5%                         | 314271        | 80856           | 325238    | 121550 |          |          |             |    |
| 97.5%                        | 347247        | 94448           | 382771    | 145647 |          |          |             |    |
| M2 exp growth                | 341684        | 88062           | 348720    | 89409  | -1.2E-07 | -7.0E-06 | -1023247    | 6  |
| 2.5%                         | 333318        | 74215           | 341263    | 76979  | -1.1E-06 | -1.5E-05 |             |    |
| 97.5%                        | 371305        | 99481           | 398762    | 99232  | -1.2E-07 | -2.4E-06 |             |    |

<sup>a</sup> Model M1 estimated divergence using a stepwise model of population size change, and model M2 estimated exponential population size changes in the polyploid and diploids using the software fastsimcoal 2.6<sup>32</sup>. A minimum of 100,000 and maximum of 250,000 coalescent simulations with 10-40 cycles likelihood maximization was used to estimate parameters and model likelihoods. 95% confidence intervals (in gray; lower: 2.5% and upper: 97.5%) were estimated using 100 simulated joints site frequency spectra for each of the two subgenomes and running them using the same model priors and input parameters as the empirical datasets. For both diploid-subgenome comparisons, the M1 model had significantly higher likelihoods. Parameters:  $N_e$  = effective population size,  $N_e$  ANC = ancestral effective population size,  $Tdiv$  = time of divergence, R0 = rate of exponential population growth of diploids, R1 = rate of exponential population growth of polyploid subgenomes.

**Supplementary Table 10.** High-impact mutations<sup>a</sup>.

| <b>Homeolog</b>                       | <b>frameshift<br/>variant</b> | <b>start lost</b> | <b>stop<br/>gained</b> | <b>stop lost</b> | <b>total<sup>b</sup></b> | <b>% total</b> |
|---------------------------------------|-------------------------------|-------------------|------------------------|------------------|--------------------------|----------------|
| H-origin                              | 3311                          | 282               | 1662                   | 190              | 4219                     | 20.78          |
| L-origin                              | 4014                          | 423               | 2002                   | 251              | 4952                     | 24.39          |
| Shared in both homeologs <sup>c</sup> |                               |                   |                        |                  | 1559                     | 7.68           |
| Shared in genotypes <sup>d</sup>      |                               |                   |                        |                  | 511                      | 2.52           |

<sup>a</sup> Counts are the number of homeologs with one or more of any of the mutation types.

<sup>b</sup> total number of homeologs with one or more high-impact mutations (multiple mutation types are possible in a single homeolog).

<sup>c</sup> total number of genes with high-impact mutations in both homeologs out of 25 individuals

<sup>d</sup> total number of high-impact mutations in both homeologs in an individual.

**Supplementary Table 11. Gene Ontology of high-impact mutations <sup>a</sup>.**

| H-origin                                      |           |                                    |           |            |         |          |          |         |
|-----------------------------------------------|-----------|------------------------------------|-----------|------------|---------|----------|----------|---------|
| GO_acc                                        | term_type | Term                               | queryitem | querytotal | refitem | reftotal | pvalue   | FDR     |
| GO:0003824                                    | F         | catalytic activity                 | 1507      | 4273       | 6350    | 19936    | 6.90E-05 | 0.036   |
| GO:0016787                                    | F         | hydrolase activity                 | 567       | 4273       | 2285    | 19936    | 0.00014  | 0.036   |
| GO:0001883                                    | F         | purine nucleoside binding          | 260       | 4273       | 983     | 19936    | 0.00015  | 0.036   |
| GO:0001882                                    | F         | nucleoside binding                 | 260       | 4273       | 983     | 19936    | 0.00015  | 0.036   |
| GO:0030554                                    | F         | adenyl nucleotide binding          | 260       | 4273       | 983     | 19936    | 0.00015  | 0.036   |
| GO:0019825                                    | F         | oxygen binding                     | 58        | 4273       | 159     | 19936    | 1.10E-05 | 0.011   |
| GO:0012501                                    | P         | programmed cell death              | 45        | 4273       | 111     | 19936    | 4.60E-06 | 0.012   |
| GO:0008236                                    | F         | serine-type peptidase activity     | 42        | 4273       | 115     | 19936    | 0.00016  | 0.036   |
| GO:0017171                                    | F         | serine hydrolase activity          | 42        | 4273       | 115     | 19936    | 0.00016  | 0.036   |
| GO:0006915                                    | P         | apoptosis                          | 32        | 4273       | 61      | 19936    | 1.10E-07 | 0.00056 |
| GO:0004888                                    | F         | transmembrane receptor activity    | 31        | 4273       | 64      | 19936    | 1.60E-06 | 0.0033  |
| L-origin                                      |           |                                    |           |            |         |          |          |         |
| GO_acc                                        | term_type | Term                               | queryitem | querytotal | refitem | reftotal | pvalue   | FDR     |
| GO:0016787                                    | F         | hydrolase activity                 | 663       | 5031       | 2285    | 19936    | 5.90E-05 | 0.022   |
| GO:0017076                                    | F         | purine nucleotide binding          | 346       | 5031       | 1146    | 19936    | 0.00013  | 0.03    |
| GO:0001882                                    | F         | nucleoside binding                 | 314       | 5031       | 983     | 19936    | 2.50E-06 | 0.0019  |
| GO:0001883                                    | F         | purine nucleoside binding          | 314       | 5031       | 983     | 19936    | 2.50E-06 | 0.0019  |
| GO:0030554                                    | F         | adenyl nucleotide binding          | 314       | 5031       | 983     | 19936    | 2.50E-06 | 0.0019  |
| GO:0032559                                    | F         | adenyl ribonucleotide binding      | 294       | 5031       | 927     | 19936    | 8.80E-06 | 0.0044  |
| GO:0005524                                    | F         | ATP binding                        | 292       | 5031       | 921     | 19936    | 9.70E-06 | 0.0044  |
| GO:0017111                                    | F         | nucleoside-triphosphatase activity | 185       | 5031       | 574     | 19936    | 0.00013  | 0.03    |
| GO:0019825                                    | F         | oxygen binding                     | 61        | 5031       | 159     | 19936    | 0.00019  | 0.04    |
| GO:0008236                                    | F         | serine-type peptidase activity     | 48        | 5031       | 115     | 19936    | 8.40E-05 | 0.024   |
| GO:0017171                                    | F         | serine hydrolase activity          | 48        | 5031       | 115     | 19936    | 8.40E-05 | 0.024   |
| Shared in both homeologs in a single genotype |           |                                    |           |            |         |          |          |         |
| GO_acc                                        | term_type | Term                               | queryitem | querytotal | refitem | reftotal | pvalue   | FDR     |
| GO:0060089                                    | F         | molecular transducer activity      | 17        | 497        | 239     | 19936    | 0.00014  | 0.013   |
| GO:0004871                                    | F         | signal transducer activity         | 17        | 497        | 239     | 19936    | 0.00014  | 0.013   |
| GO:0004872                                    | F         | receptor activity                  | 11        | 497        | 95      | 19936    | 2.90E-05 | 0.0052  |
| GO:0012501                                    | P         | programmed cell death              | 11        | 497        | 111     | 19936    | 0.00012  | 0.042   |
| GO:0004888                                    | F         | transmembrane receptor activity    | 10        | 497        | 64      | 19936    | 4.50E-06 | 0.0016  |
| GO:0006915                                    | P         | apoptosis                          | 9         | 497        | 61      | 19936    | 2.10E-05 | 0.015   |

<sup>a</sup> GO analysis was conducted for premature stop codon and frameshift combined only for H-origin and L-origin derived coding sequences. GO analysis was also done for genes with any of the four high-impact mutation types (from Supplementary Table 10) where both homeologs in a single genotype had disruptive mutations (shared in both homeologs in a single genotype).



## Supplementary References

1. Briskine, R. V. *et al.* Genome assembly and annotation of *Arabidopsis halleri*, a model for heavy metal hyperaccumulation and evolutionary ecology. *Mol. Ecol. Resour.* **5**, 1025-1036 (2016).
2. Shimizu-Inatsugi, R. *et al.* The allopolyploid *Arabidopsis kamchatica* originated from multiple individuals of *Arabidopsis lyrata* and *Arabidopsis halleri*. *Mol. Ecol.* **18**, 4024–4048 (2009).
3. Schmickl, R., Jørgensen, M. H., Brysting, A. K. & Koch, M. A. The evolutionary history of the *Arabidopsis lyrata* complex: a hybrid in the amphi-Beringian area closes a large distribution gap and builds up a genetic barrier. *BMC Evol. Biol.* **10**, 98 (2010).
4. Tsuchimatsu, T. *et al.* Evolution of self-compatibility in *Arabidopsis* by a mutation in the male specificity gene. *Nature* **464**, 1342–1346 (2010).
5. Akama, S., Shimizu-Inatsugi, R., Shimizu, K. K. & Sese, J. Genome-wide quantification of homeolog expression ratio revealed nonstochastic gene regulation in synthetic allopolyploid *Arabidopsis*. *Nucleic Acids Res.* **42**, e46–e46 (2014).
6. Butler, J. *et al.* ALLPATHS: De novo assembly of whole-genome shotgun microreads. *Genome Res.* **18**, 810–820 (2008).
7. AUGUSTUS Development Team. Incorporating RNAseq data into AUGUSTUS with TopHat. (2014). Available at: <http://bioinf.uni-greifswald.de/bioinf/wiki/pmwiki.php?n=IncorporatingRNAseq.Tophat>. (Accessed: 15th January 2015)
8. Paape, T. *et al.* Conserved but attenuated parental gene expression in allopolyploids: Constitutive zinc hyperaccumulation in the allotetraploid *Arabidopsis kamchatica*. *Mol. Biol. Evol.* **33**, 2781–2800 (2016).
9. Dobin, A. *et al.* STAR: ultrafast universal RNA-seq aligner. *Bioinformatics* **29**, 15–21 (2013).

10. Smit, A., Hubley, R. & Green, P. RepeatMasker Open-3.0. (1996). Available at:  
<http://www.repeatmasker.org>.
11. Langmead, B. & Salzberg, S. L. Fast gapped-read alignment with Bowtie 2. *Nat. Methods* **9**, 357–359 (2012).
12. Tomato Genome Consortium. The tomato genome sequence provides insights into fleshy fruit evolution. *Nature* **485**, 635–641 (2012).
13. Rawat, V. *et al.* Improving the Annotation of *Arabidopsis lyrata* Using RNA-Seq Data. *PLOS ONE* **10**, e0137391 (2015).
14. Roux, C. *et al.* Does speciation between *Arabidopsis halleri* and *Arabidopsis lyrata* coincide with major changes in a molecular target of adaptation? *PLoS ONE* **6**, e26872 (2011).
15. Al-Shehbaz, I. A. & O’Kane, S. L. Taxonomy and Phylogeny of *Arabidopsis* (Brassicaceae). *Arab. Book* **1**, e0001 (2002).
16. Hu, T. T. *et al.* The *Arabidopsis lyrata* genome sequence and the basis of rapid genome size change. *Nat. Genet.* **43**, 476–481 (2011).
17. Kent, W. J. BLAT—The BLAST-Like Alignment Tool. *Genome Res.* **12**, 656–664 (2002).
18. Arrivault, S., Senger, T. & Krämer, U. The *Arabidopsis* metal tolerance protein AtMTP3 maintains metal homeostasis by mediating Zn exclusion from the shoot under Fe deficiency and Zn oversupply. *Plant J.* **46**, 861–879 (2006).
19. Filatov, V. *et al.* Comparison of gene expression in segregating families identifies genes and genomic regions involved in a novel adaptation, zinc hyperaccumulation: GENE EXPRESSION IN SEGREGATING FAMILIES. *Mol. Ecol.* **15**, 3045–3059 (2006).
20. Talke, I. N. Zinc-dependent global transcriptional control, transcriptional deregulation, and higher gene copy number for genes in metal homeostasis of the hyperaccumulator *Arabidopsis halleri*. *PLANT Physiol.* **142**, 148–167 (2006).
21. Hanikenne, M. *et al.* Evolution of metal hyperaccumulation required cis-regulatory changes and triplication of HMA4. *Nature* **453**, 391–395 (2008).

22. Shahzad, Z. *et al.* The Five AhMTP1 Zinc Transporters Undergo Different Evolutionary Fates towards Adaptive Evolution to Zinc Tolerance in *Arabidopsis halleri*. *PLoS Genet.* **6**, e1000911 (2010).
23. Lamesch, P. *et al.* The Arabidopsis Information Resource (TAIR): improved gene annotation and new tools. *Nucleic Acids Res.* **40**, D1202–D1210 (2012).
24. Shahzad, Z. *et al.* *Plant Defensin type 1 (PDF1)*: protein promiscuity and expression variation within the *Arabidopsis* genus shed light on zinc tolerance acquisition in *Arabidopsis halleri*. *New Phytol.* **200**, 820–833 (2013).
25. Tsuchimatsu, T., Kaiser, P., Yew, C.-L., Bachelier, J. B. & Shimizu, K. K. Recent Loss of Self-Incompatibility by Degradation of the Male Component in Allotetraploid Arabidopsis kamchatica. *PLoS Genet.* **8**, e1002838 (2012).
26. Pritchard, J. K., Stephens, M. & Donnelly, P. Inference of population structure using multilocus genotype data. *Genetics* **155**, 945–959 (2000).
27. Ronquist, F. *et al.* MrBayes 3.2: Efficient Bayesian Phylogenetic Inference and Model Choice Across a Large Model Space. *Syst. Biol.* **61**, 539–542 (2012).
28. Evanno, G., Regnaut, S. & Goudet, J. Detecting the number of clusters of individuals using the software structure: a simulation study. *Mol. Ecol.* **14**, 2611–2620 (2005).
29. Novikova, P. Y. *et al.* Sequencing of the genus *Arabidopsis* identifies a complex history of nonbifurcating speciation and abundant trans-specific polymorphism. *Nat. Genet.* **48**, 1077–1082 (2016).
30. Koch, M. A., Haubold, B. & Mitchell-Olds, T. Comparative evolutionary analysis of Chalcone Synthase and Alcohol Dehydrogenase loci in *Arabidopsis*, *Arabis*, and related genera (Brassicaceae). *Mol. Biol. Evol.* **17**, 1483–1498 (2000).
31. Ossowski, S. *et al.* The rate and molecular spectrum of spontaneous mutations in *Arabidopsis thaliana*. *Science* **327**, 92–94 (2010).

32. Excoffier, L., Dupanloup, I., Huerta-Sánchez, E., Sousa, V. C. & Foll, M. Robust demographic inference from genomic and SNP data. *PLoS Genet.* **9**, e1003905 (2013).
